# Supplementary material for: Genome-based development of 15 microsatellite markers in fluorescent multiplexes for parentage testing in captive tigers
Source: PeerJ journal article supplement (doi:10.7717/peerj.8939), 2020-05-06

A

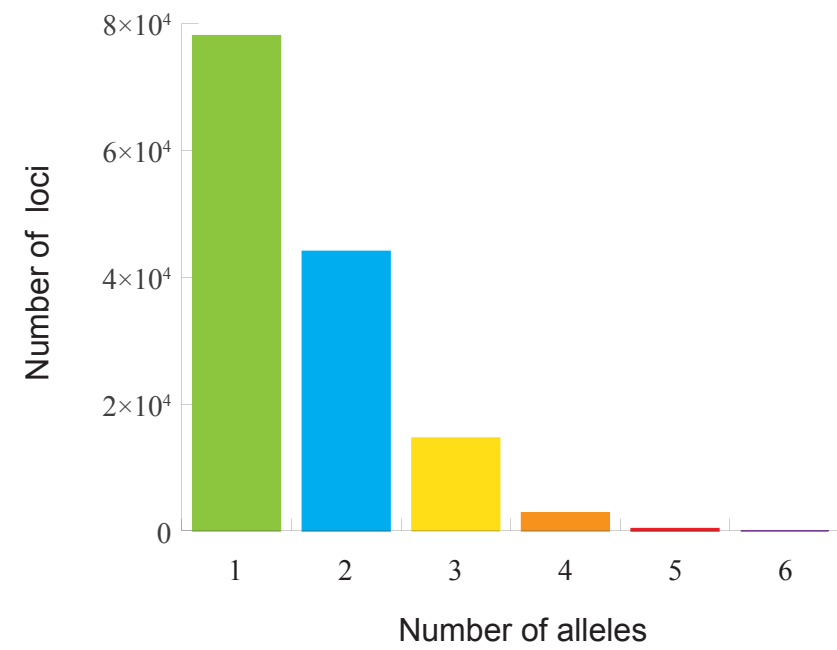

B

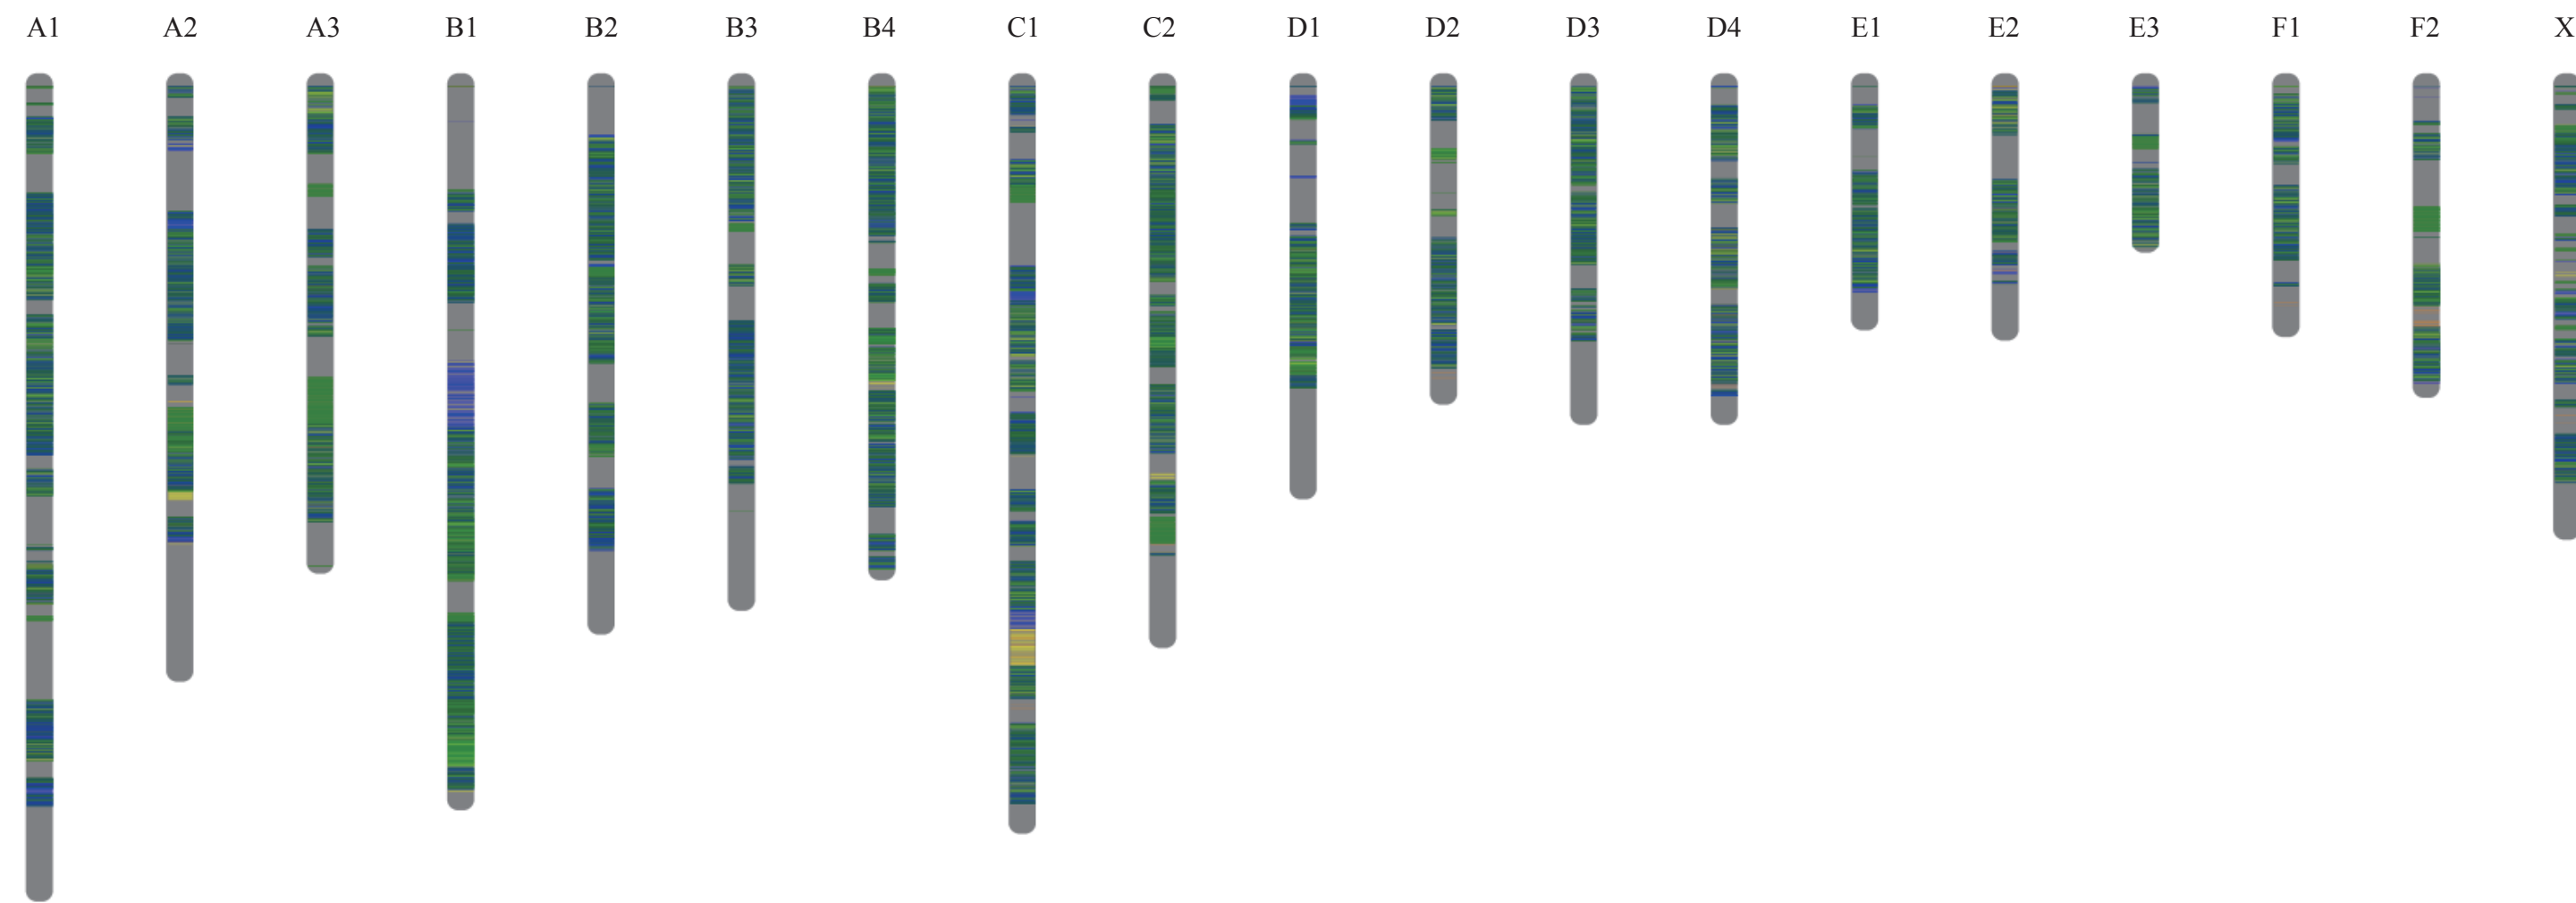

Supplement: Supplemental_Figure_S1.pdf [file Supplemental_Figure_S1.pdf]
