# Supplementary material for: Genome-based development of 15 microsatellite markers in fluorescent multiplexes for parentage testing in captive tigers
Source: PeerJ journal article supplement (doi:10.7717/peerj.8939), 2020-05-06

F-Primer

5' GAGAGGCAARTAGGAGTGTGC 3'

R-Primer

5' TTCAAGATGTTTCTCAGTCC 3'

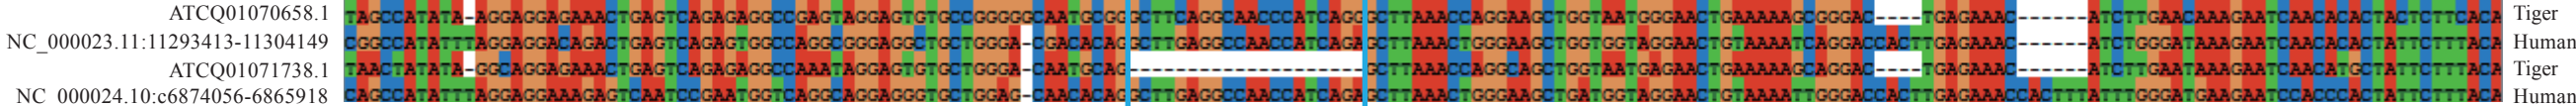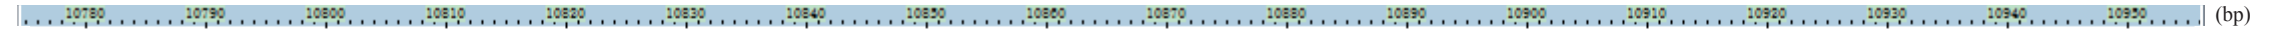

Supplement: Supplemental_Figure_S2.pdf [file Supplemental_Figure_S2.pdf]
