# Supplementary material for: Genome-based development of 15 microsatellite markers in fluorescent multiplexes for parentage testing in captive tigers
Source: PeerJ journal article supplement (doi:10.7717/peerj.8939), 2020-05-06
Supplement: Supplemental_Figure_S3.pdf [file Supplemental_Figure_S3.pdf]

RT01

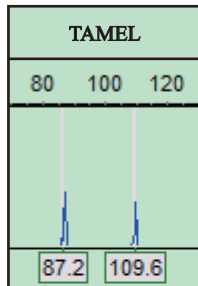

RT04

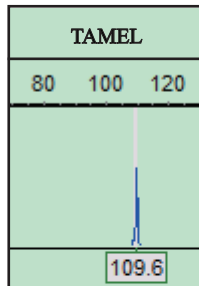

RT05

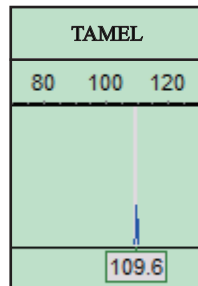

RT06

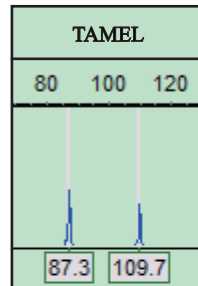

RT07

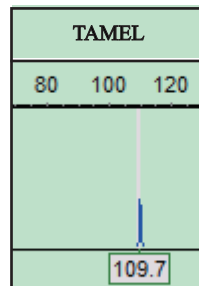

SIP :

Male

Female

Female

Male

Female

SII :

X, Y / Male

X, X / Female

X, X / Female

X, Y / Male

X, X / Female

RT08

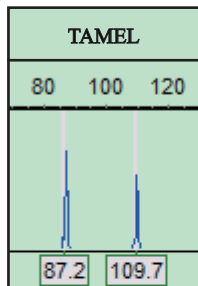

RT10

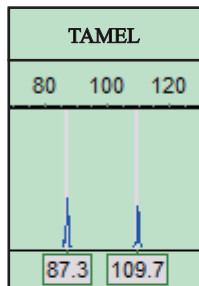

RT11

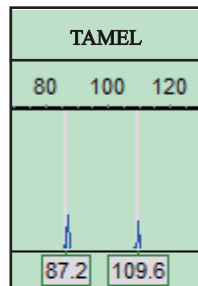

RT14

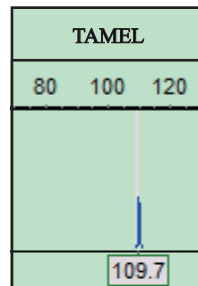

RT15

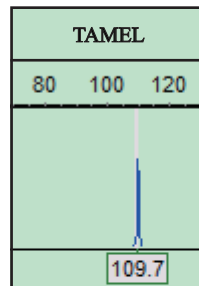

SIP :

Male

Male

Male

Female

Female

SII :

X, Y / Male

X, Y / Male

X, Y / Male

X, X / Female

X, X / Female
